# Supplementary material
Source: PubMed Central journal article supplement (PMC6646135)
Supplement: ao8b00842_si_001.pdf [file ao8b00842_si_001.pdf]

# Triacetin enhances levels of acrolein, formaldehyde hemiacetals and acetaldehyde in electronic cigarette aerosols

Shawna Vreeke,<sup>†</sup> David H. Peyton<sup>†</sup> and Robert M. Strongin<sup>†,\*</sup>

<sup>†</sup>Department of Chemistry, Portland State University, 1719 SW 10th Avenue, Portland, Oregon 97201,  
United States

## Supplementary Information

### Synthesis and characterization of $^{13}\text{C}$ -labeled triacetin.

**General procedure from glycerol.** Glycerol (5 mmol, 1 equiv.) and acetic anhydride (20 mmol, 4 equiv.) were added to a 50 mL round bottom flask with a magnetic stir bar. Pyridine (20 mmol, 4 equiv.) was added and sealed with a closed cap. The solution was stirred for 24 hours. The mixture was added to a separatory funnel, and the ethyl acetate (EtOAc)/water layers separated. The water layer was extracted with EtOAc (3 × 50 mL). The combined EtOAc layers were dried over  $\text{Na}_2\text{SO}_4$ , filtered, and the solvent removed on the rotary evaporator. The crude residue was purified by flash column chromatography on silica gel with EtOAc/hexane 4/6 mixture as the eluent.

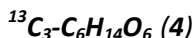

Prepared according to the general procedure on 1.6 mmol scale and obtained an isolated yield of 95% (0.3326 g) as a clear liquid. Spectral data is consistent with that of commercially obtained triacetin.

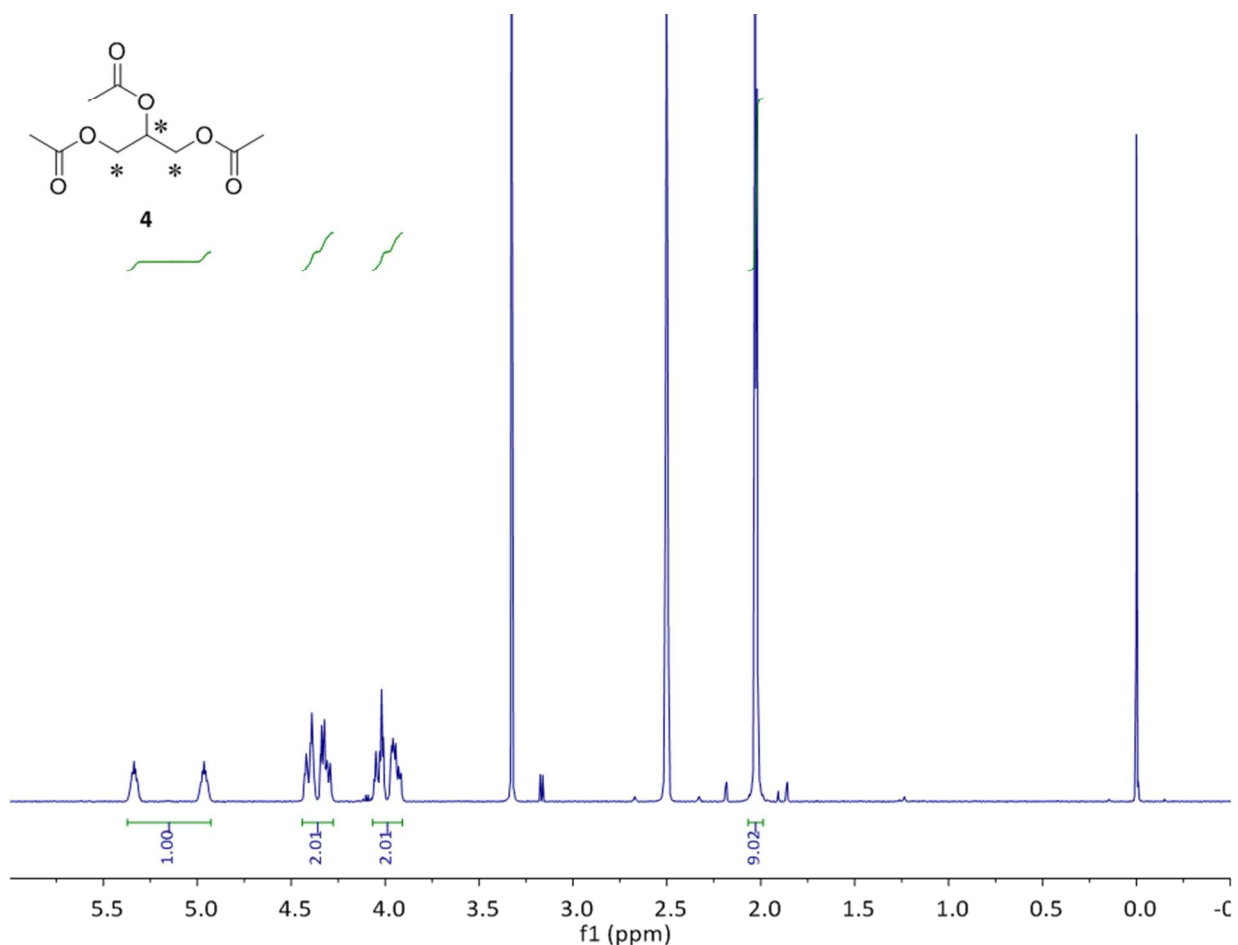

**Figure S1.**  $^1\text{H}$  NMR spectra of compound **4** ( $^{13}\text{C}_3\text{-TA}$ ). The asterisks represent the  $^{13}\text{C}$ -labeling.

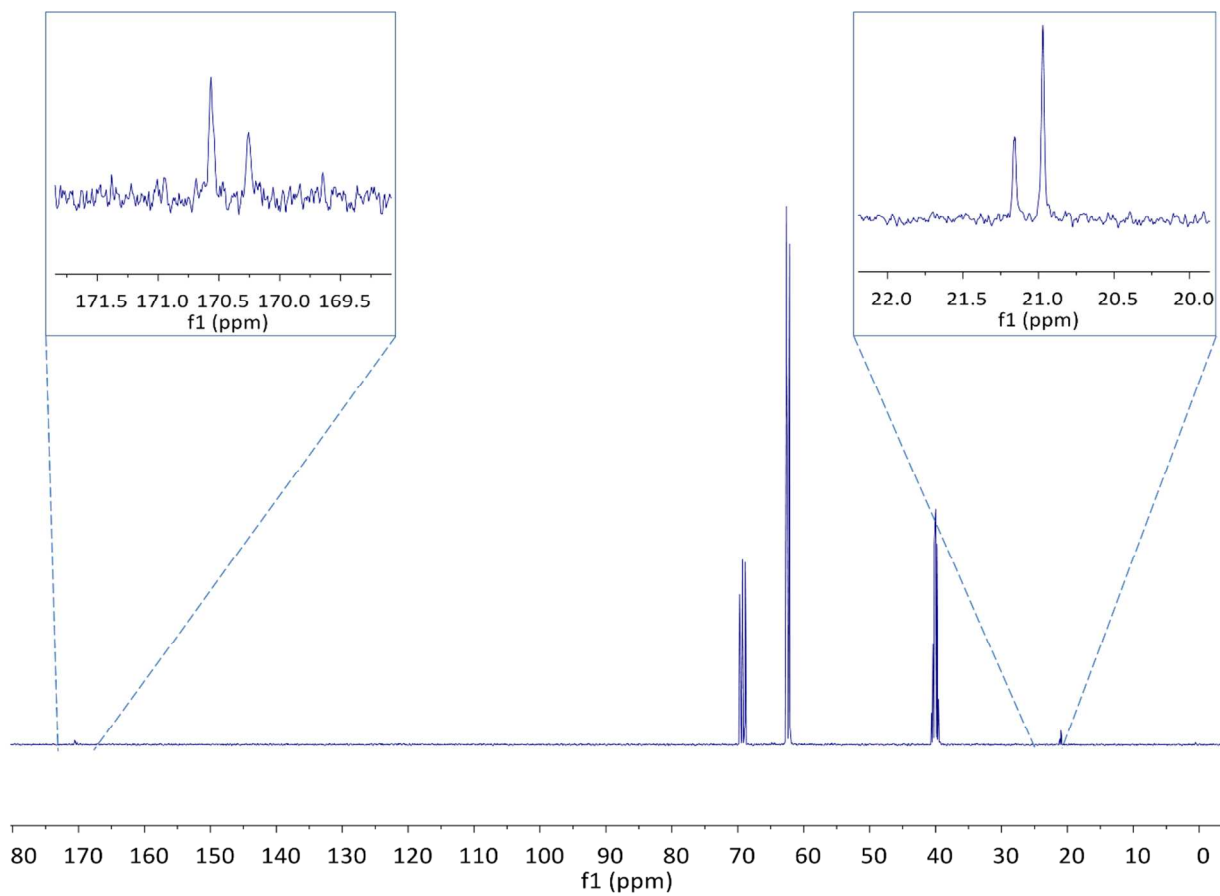

**Figure S2.**  $^{13}\text{C}$  NMR spectra of compound **4** ( $^{13}\text{C}_3$ -TA). The insets display the carbon peaks which are at much lower relative intensities due to the  $^{13}\text{C}$ -labeling.

$^{13}\text{C}_6\text{-C}_3\text{H}_{14}\text{O}_6$  (**5**)

Prepared according to the general procedure on 1.1 mmol scale and obtained an isolated yield of 95% (0.2333 g) as a clear liquid. Spectral data is consistent with that of commercially obtained triacetin.

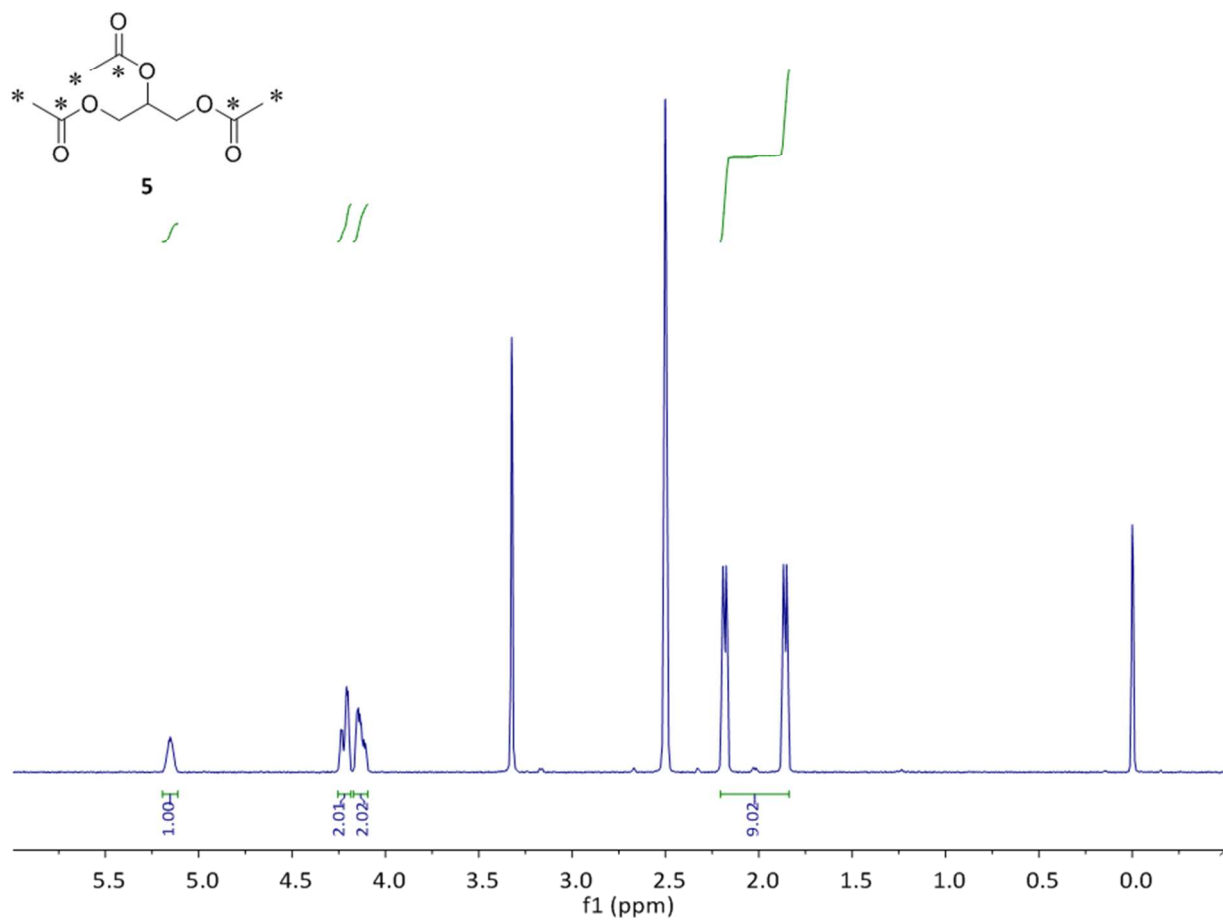

**Figure S3.**  $^1\text{H}$  NMR spectra of compound **5** ( $^{13}\text{C}_6\text{-TA}$ ). The asterisks represent the  $^{13}\text{C}$ -labeling.

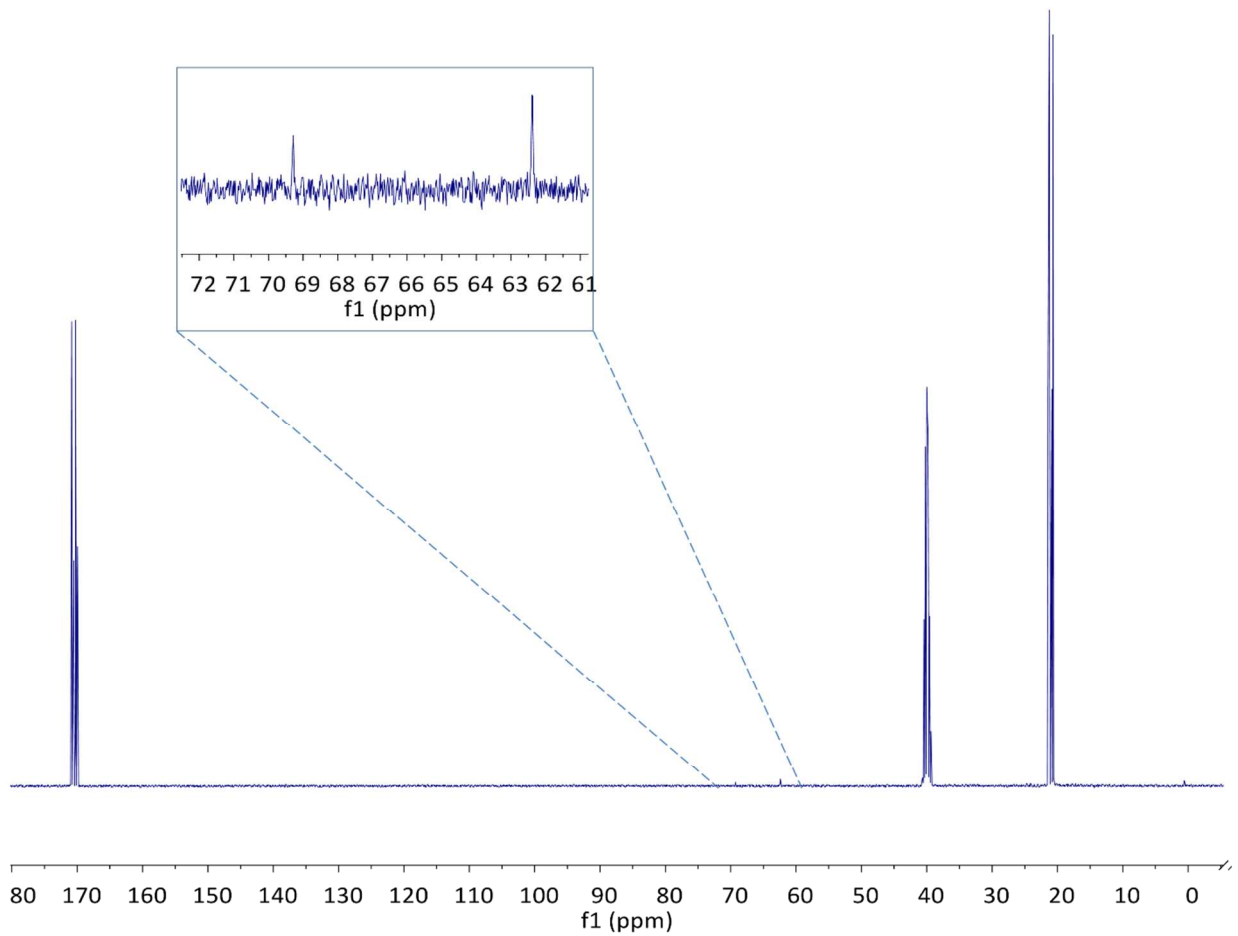

**Figure S4.**  $^{13}\text{C}$  NMR spectra of compound **5** ( $^{13}\text{C}_6$ -TA). The inset displays the carbon peaks which are at much lower relative intensities due to the  $^{13}\text{C}$ -labeling.

**Quantification of 1a-3.** Table S1 reports the quantification of formaldehyde hemiacetals (**1a-b**), acrolein (**2**), and acetaldehyde (**3**) by <sup>1</sup>H NMR using relative integrations against an internal standard. Values are presented as an average mg/g e-liquid consumed for each wattage tested. **1a-b** were integrated together due to their overlapping peaks. A p-value of <0.05 represents statistical significance. LOD was calculated to be 0.025mM using the International Union of Pure and Applied Chemistry method.<sup>1</sup> Table S2 reports the mass of e-liquid consumed for each sample, which were used to calculate the average mg/g.

**Table S1.** Quantification of compounds **1a-b**, **2** and **3** by <sup>1</sup>H NMR.

| EC1: SMOK® Baby Q2     |                 |                                                              |                    |                                                              |                    |         |
|------------------------|-----------------|--------------------------------------------------------------|--------------------|--------------------------------------------------------------|--------------------|---------|
| Power setting          | Target compound | Concentration of solute in aerosol of PG/GLY e-liquid (mg/g) | Standard deviation | Concentration of solute in aerosol of 10% TA e-liquid (mg/g) | Standard deviation | p-value |
| 55W                    | 1a and b        | 0.00046                                                      | 0.000656           | 0.00084                                                      | 0.00070            | 0.611   |
|                        | 2               | <LOD                                                         | -                  | 0.00039                                                      | 0.00055            | -       |
|                        | 3               | <LOD                                                         | -                  | <LOD                                                         | -                  | -       |
| 65W                    | 1a and b        | 0.00062                                                      | 0.000513           | 0.00162                                                      | 0.00024            | 0.034   |
|                        | 2               | <LOD                                                         | -                  | 0.00043                                                      | 0.00047            | -       |
|                        | 3               | <LOD                                                         | -                  | <LOD                                                         | -                  | -       |
| EC2: Kanger® Protank 2 |                 |                                                              |                    |                                                              |                    |         |
| 9W                     | 1a and b        | <LOD                                                         | -                  | 0.0937                                                       | 0.0930             | -       |
|                        | 2               | <LOD                                                         | -                  | 0.0047                                                       | 0.0059             | -       |
|                        | 3               | <LOD                                                         | -                  | 0.0030                                                       | 0.0041             | -       |
| 11W                    | 1a and b        | 0.463                                                        | 0.329              | 1.323                                                        | 0.302              | 0.029   |
|                        | 2               | 0.208                                                        | 0.119              | 0.519                                                        | 0.134              | 0.044   |
|                        | 3               | 0.137                                                        | 0.101              | 0.373                                                        | 0.085              | 0.036   |

**Table S2.** Mass of e-liquid consumed for each sample collected.

| <b>EC1: SMOK Baby Q2</b>     |                          |                                       |                                     |                                   |
|------------------------------|--------------------------|---------------------------------------|-------------------------------------|-----------------------------------|
| <b>Power setting</b>         | <b>E-liquid solution</b> | <b>Initial mass of cartomizer (g)</b> | <b>Final mass of cartomizer (g)</b> | <b>Mass e-liquid consumed (g)</b> |
| <b>55W</b>                   | <b>PG/GLY</b>            | <b>49.5742</b>                        | <b>49.1751</b>                      | <b>0.3991</b>                     |
|                              |                          | <b>49.5742</b>                        | <b>49.1751</b>                      | <b>0.3991</b>                     |
|                              |                          | <b>49.5051</b>                        | <b>49.1576</b>                      | <b>0.3475</b>                     |
|                              | <b>TA/PG/GLY</b>         | <b>49.7639</b>                        | <b>49.4324</b>                      | <b>0.3315</b>                     |
|                              |                          | <b>49.6284</b>                        | <b>49.3175</b>                      | <b>0.3109</b>                     |
|                              |                          | <b>49.4698</b>                        | <b>49.1166</b>                      | <b>0.3532</b>                     |
| <b>65W</b>                   | <b>PG/GLY</b>            | <b>49.5416</b>                        | <b>49.1049</b>                      | <b>0.4367</b>                     |
|                              |                          | <b>49.7651</b>                        | <b>49.3618</b>                      | <b>0.4033</b>                     |
|                              |                          | <b>49.5471</b>                        | <b>49.1750</b>                      | <b>0.3721</b>                     |
|                              | <b>TA/PG/GLY</b>         | <b>49.6309</b>                        | <b>49.2638</b>                      | <b>0.3671</b>                     |
|                              |                          | <b>49.6385</b>                        | <b>49.2717</b>                      | <b>0.3668</b>                     |
|                              |                          | <b>49.6965</b>                        | <b>49.3786</b>                      | <b>0.3179</b>                     |
|                              |                          | <b>49.4190</b>                        | <b>49.0114</b>                      | <b>0.4076</b>                     |
| <b>EC2: Kanger Protank 2</b> |                          |                                       |                                     |                                   |
| <b>9 W</b>                   | <b>PG/GLY</b>            | <b>42.8153</b>                        | <b>42.7423</b>                      | <b>0.0730</b>                     |
|                              |                          | <b>42.9256</b>                        | <b>42.8630</b>                      | <b>0.0626</b>                     |
|                              |                          | <b>43.0114</b>                        | <b>42.9397</b>                      | <b>0.0717</b>                     |
|                              | <b>TA/PG/GLY</b>         | <b>43.0143</b>                        | <b>42.8431</b>                      | <b>0.1712</b>                     |
|                              |                          | <b>42.8698</b>                        | <b>42.7840</b>                      | <b>0.0858</b>                     |
|                              |                          | <b>42.7369</b>                        | <b>42.6343</b>                      | <b>0.1026</b>                     |
| <b>11 W</b>                  | <b>PG/GLY</b>            | <b>43.1723</b>                        | <b>43.0388</b>                      | <b>0.1335</b>                     |
|                              |                          | <b>42.7491</b>                        | <b>42.6496</b>                      | <b>0.0995</b>                     |
|                              |                          | <b>42.7623</b>                        | <b>42.6592</b>                      | <b>0.1031</b>                     |
|                              | <b>TA/PG/GLY</b>         | <b>42.8196</b>                        | <b>42.7098</b>                      | <b>0.1098</b>                     |
|                              |                          | <b>42.6840</b>                        | <b>42.5752</b>                      | <b>0.1088</b>                     |
|                              |                          | <b>42.7170</b>                        | <b>42.6214</b>                      | <b>0.0956</b>                     |
|                              |                          | <b>42.3275</b>                        | <b>42.2355</b>                      | <b>0.0920</b>                     |

**Reported concentration range of triacetin in e-liquid.** Due to the current FDA regulations e-cigarette liquid manufactures do not need to report the full chemical composition of the e-liquid nor the chemical concentration. To determine the concentration that was used for this study, we compiled a list of the few manufacturers that report TA in their e-liquid, as well as one recent published report of TA concentration within e-liquid. Reported in Table S3 is the number of TA containing e-liquids that have a concentration level reported at or above 10% from each source. The 10% TA concentration used in this study represents a conservative and relevant concentration.

**Table S3.** Reported concentration range of triacetin in e-liquid.

|                                | Number of TA-containing e-liquids reported with TA levels $\geq$ 10 % |
|--------------------------------|-----------------------------------------------------------------------|
| Flavor Apprentice <sup>2</sup> | 7 of 19                                                               |
| Simply Flavors <sup>3</sup>    | 39 of 51                                                              |
| Flavor West <sup>4</sup>       | 13 of 24 (post-dilution)                                              |
| Behar, R. et al. <sup>5</sup>  | 0 of 5                                                                |

**Self-reported users' preferences for power output setting.** To determine which battery power settings would be used for this study, we manually recorded users' self-reported preferences from Reddit. Two wattages were chosen for each e-cigarette device which would cover the range of reported preferences. Below is the list used; however, this is not an exhausted search due to the high volume of conversations and responses found on Reddit.

*SMOK Baby, Q2 0.4 ohm coil*

- BeholderVee: "Tried a q2 coil on baby on 30-55w..."<sup>6</sup>
- [deleted]: "I like to vape around 45-55 watts. (Q2)." <sup>7</sup>
- Urano\_Metria: "...I find the best flavor at 55W and notice I get the best vapor production and temp at around 65W, I have no problems sacrificing a tiny bit of flavor and vaping it at 60W." <sup>8</sup>
- DeadRights: "I usually run it at about 65 - 70 watts." <sup>9</sup>
- Rezingreenbowl: "...using the Q2 at 65w..." <sup>10</sup>
- 702jimboalice: "best through 55-65 and that's where it seems to have a sweet spot..." <sup>11</sup>

*Protank 2, 2.2 ohm coil*

- Cravingvapor: "I am normally vaping at 8-10 watts." <sup>12</sup>
- residualenvy. "...for my liking 2.2 at about 10W works great." <sup>13</sup>
- kkeeiiggaann: "...don't need to be used above 8-9w to put out a decent vape." <sup>14</sup>
- swancitysounds: "I like to stick around 9 watts." <sup>15</sup>
- BikerKnight: "Would work great on your Protank 2 at 7-12W..." <sup>16</sup>
- Okolo: "...depending on the juice I'm using, going up to 11 watts improves the taste..." <sup>17</sup>
- NELyon: "I usually have my VV with the MPT2 at around 10.5 or 11 watts..." <sup>18</sup>



## References

---

1. V. Thomsen, D. Schatzlein and D. Mercurio, Limits of detection in spectroscopy. *Spectroscopy* **2003** 18 (12), 112-114.
- 2 Perfumers Apprentice. Products With Cas # 102-76-1 : Triacetin.  
<https://shop.perfumersapprentice.com/specsheetlist.aspx> (accessed on June 04, 2018)
- 3 Simply Flavors. Search results for "triacetin." [http://www.simplyflavor.com/search.php?search\\_query=triacetin](http://www.simplyflavor.com/search.php?search_query=triacetin) (accessed on June 04, 2018)
- 4 Flavor West. Search results for "triacetin." <http://flavorwest.com/index.php/catalogsearch/result/?q=triacetin> (accessed on June 04, 2018)
- 5 Behar, R. Z.; Luo, W.; McWhirter, K. J.; Pankow, J. F.; Talbot, P., Analytical and toxicological evaluation of flavor chemicals in electronic cigarette refill fluids. *Sci. Rep.* **2018**, 8 (1), 8288.
- 6 BeholderVee. Comment on Smok TFV8 burnt taste. *Reddit*. [https://www.reddit.com/r/electronic\\_cigarette/comments/5g52hy/smok\\_tfv8\\_burnt\\_taste/](https://www.reddit.com/r/electronic_cigarette/comments/5g52hy/smok_tfv8_burnt_taste/) (accessed on Aug 11, 2017)
- 7 Deleted. Comment on Best settings to use the smok alien at? *Reddit*.  
[https://www.reddit.com/r/Vaping/comments/5jvanx/best\\_settings\\_to\\_use\\_the\\_smok\\_alien\\_at/](https://www.reddit.com/r/Vaping/comments/5jvanx/best_settings_to_use_the_smok_alien_at/) (accessed on Aug 11, 2017)
- 8 Urano\_Metria. Comment on What settings do i need to set my alien to for the v8 baby q2 coils? *Reddit*.  
[https://www.reddit.com/r/electronic\\_cigarette/comments/6a79nu/what\\_settings\\_do\\_i\\_need\\_to\\_set\\_my\\_alien\\_to\\_for/](https://www.reddit.com/r/electronic_cigarette/comments/6a79nu/what_settings_do_i_need_to_set_my_alien_to_for/) (accessed on Aug 11, 2017)
- 9 DeadRights. Comment on I need some help avoiding the burnt hits on my SMOK TFV8 Cloud Beast Tank. *Reddit*.  
[https://www.reddit.com/r/electronic\\_cigarette/comments/7500wn/i\\_need\\_some\\_help\\_avoiding\\_the\\_burnt\\_hits\\_on\\_my/](https://www.reddit.com/r/electronic_cigarette/comments/7500wn/i_need_some_help_avoiding_the_burnt_hits_on_my/) (accessed on Aug 11, 2017)
- 10 Rezingreenbowl. Comment on Best settings to use the smok alien at? *Reddit*.  
[https://www.reddit.com/r/Vaping/comments/5jvanx/best\\_settings\\_to\\_use\\_the\\_smok\\_alien\\_at/](https://www.reddit.com/r/Vaping/comments/5jvanx/best_settings_to_use_the_smok_alien_at/) (accessed on Aug 11, 2017)
11. 702jimboalice. Comment on Best settings to use the smok alien at? *Reddit*.  
[https://www.reddit.com/r/Vaping/comments/5jvanx/best\\_settings\\_to\\_use\\_the\\_smok\\_alien\\_at/](https://www.reddit.com/r/Vaping/comments/5jvanx/best_settings_to_use_the_smok_alien_at/) (accessed on Aug 11, 2017)
12. Cravingvapor. Comment on I have a couple of protank 2 questions if you don't mind! *Reddit*.  
[https://www.reddit.com/r/electronic\\_cigarette/comments/1mdnrt/i\\_have\\_a\\_couple\\_of\\_protank\\_2\\_questions\\_if\\_you/](https://www.reddit.com/r/electronic_cigarette/comments/1mdnrt/i_have_a_couple_of_protank_2_questions_if_you/) (accessed on Aug 09, 2017)
13. Residualenvy. Comment on I have a couple of protank 2 questions if you don't mind! *Reddit*.  
[https://www.reddit.com/r/electronic\\_cigarette/comments/1mdnrt/i\\_have\\_a\\_couple\\_of\\_protank\\_2\\_questions\\_if\\_you/#bottom-comments](https://www.reddit.com/r/electronic_cigarette/comments/1mdnrt/i_have_a_couple_of_protank_2_questions_if_you/#bottom-comments) (accessed on Aug 09, 2017)
14. Kkeeiiggaann. Comment on pro tank 2 help!! Please. *Reddit*.  
[https://www.reddit.com/r/electronic\\_cigarette/comments/2ppk4g/pro\\_tank\\_2\\_help\\_please/](https://www.reddit.com/r/electronic_cigarette/comments/2ppk4g/pro_tank_2_help_please/) (accessed on Aug 09, 2017)
15. Swancitysounds. Comment on What wattage or voltage to use on a 1.1 ohm coil in a kanger protank 2? *Reddit*.  
[https://www.reddit.com/r/electronic\\_cigarette/comments/1zlli7/what\\_wattage\\_or\\_voltage\\_to\\_use\\_on\\_a\\_11\\_ohm\\_coil/#bottom-comments](https://www.reddit.com/r/electronic_cigarette/comments/1zlli7/what_wattage_or_voltage_to_use_on_a_11_ohm_coil/#bottom-comments) (accessed on Aug 09, 2017)
16. BikerKnight. Comment on Transitioning from analogs: Few questions on 1.8-2.2 ohm atomizers + variable voltage-wattage batteries + nicotine level/e-juice blends for my Protank 2. *Reddit*.  
[https://www.reddit.com/r/electronic\\_cigarette/comments/3gwkvc/transitioning\\_from\\_analogs\\_few\\_questions\\_on\\_1822/](https://www.reddit.com/r/electronic_cigarette/comments/3gwkvc/transitioning_from_analogs_few_questions_on_1822/) (accessed on Aug 09, 2017)
17. Okolo. Comment on Need help with wattage settings on my iTaste VV 3.0. *Reddit*.  
[https://www.reddit.com/r/electronic\\_cigarette/comments/2440bm/need\\_help\\_with\\_wattage\\_settings\\_on\\_my\\_itaste\\_vv\\_30/](https://www.reddit.com/r/electronic_cigarette/comments/2440bm/need_help_with_wattage_settings_on_my_itaste_vv_30/) (accessed on Aug 09, 2017)

- 
18. NELyon. Comment on Need help with wattage settings on my iTaste VV 3.0. *Reddit*.  
[https://www.reddit.com/r/electronic\\_cigarette/comments/2440bm/need\\_help\\_with\\_wattage\\_settings\\_on\\_my\\_itaste\\_vv\\_30/](https://www.reddit.com/r/electronic_cigarette/comments/2440bm/need_help_with_wattage_settings_on_my_itaste_vv_30/) (accessed on Aug 09, 2017)
